# Supplementary material
Source: Copernicus journal article supplement (doi:10.5194/acp-26-8255-2026)
Supplement: Supplementary file 1 [file acp-26-8255-2026-supplement.pdf]

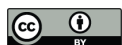

*Supplement of*

## **OH-initiated aqueous photooxidation of smoke extracts from maize straw and coal combustion: optical properties and molecular composition**

**Zhaolian Ye et al.**

*Correspondence to:* Zhaolian Ye (bess\_ye@jsut.edu.cn) and Xinlei Ge (xinlei@seu.edu.cn)

The copyright of individual parts of the supplement might differ from the article licence.

## Section S1 Inorganic ions measurement

Extracts solutions (~5 mL) were analyzed using ion chromatography (IC, Aquion, Thermo Fisher Scientific). Five cations ( $\text{Na}^+$ ,  $\text{NH}_4^+$ ,  $\text{K}^+$ ,  $\text{Mg}^{2+}$  and  $\text{Ca}^{2+}$ ) and three anions ( $\text{Cl}^-$ ,  $\text{NO}_3^-$  and  $\text{SO}_4^{2-}$ ) were measured with a Dionex CS12A and AS11-HC columns (250 mm×4 mm, Thermo Fisher Scientific), respectively. The eluent for anions was 4.5 mM  $\text{Na}_2\text{CO}_3$ +0.8 mM  $\text{NaHCO}_3$ , and 18 mM methanesulfonic acid was used for cations. The flow rate was maintained at 0.8 mL/min.

## Section S2 Supporting Figures

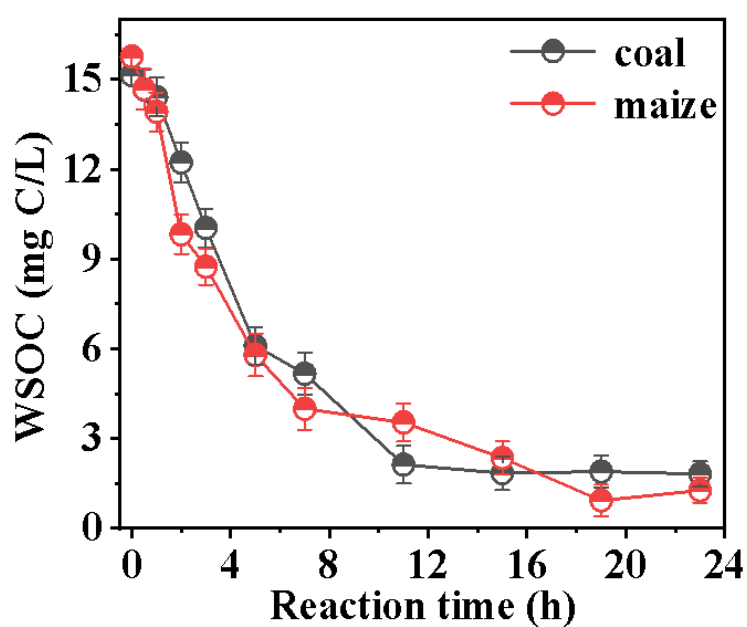

Figure S1 Changes of WSOC of two smoke extracts with reaction time

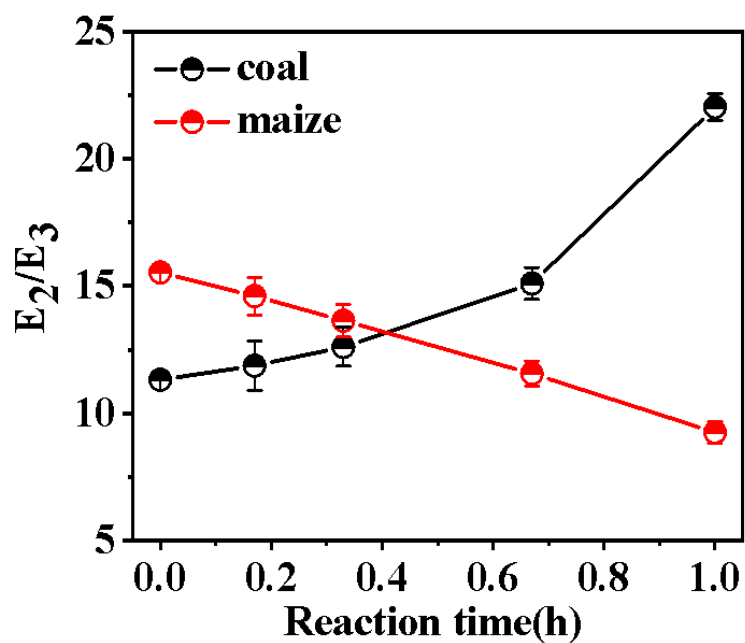

Figure S2 Temporal patterns of E<sub>2</sub>/E<sub>3</sub> for two smoke extracts with reaction time

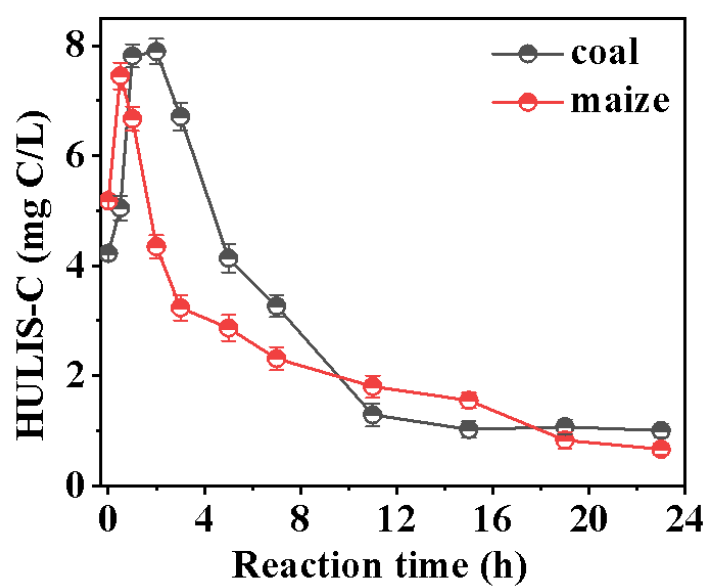

Figure S3 Change in HULIS-C concentration over time for the two smoke extracts

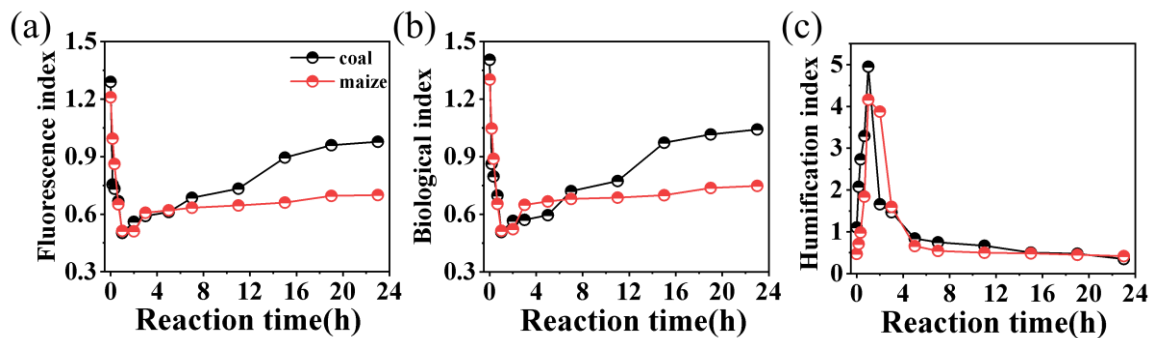

**Figure S4** Changes of three fluorescence indices (FI, BIX, and HIX) for two smoke extracts during aqueous-phase photooxidation.

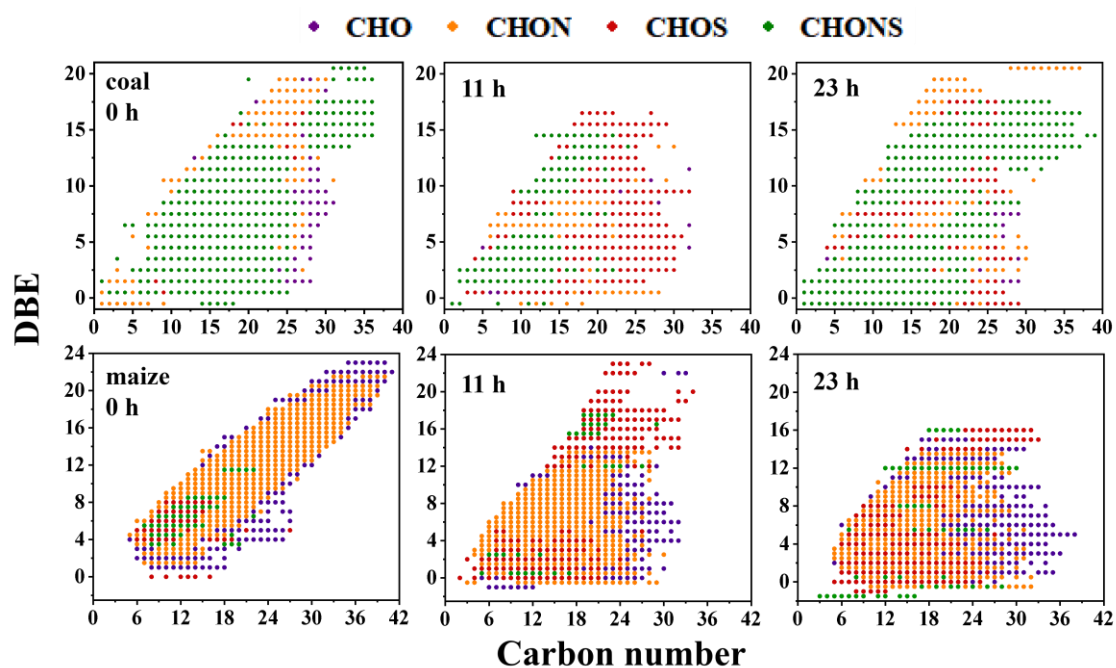

**Figure S5** Plot of double bond equivalent (DBE) vs Carbon number in coal and maize smoke extracts before and after 11 h and 23 h of photodegradation.

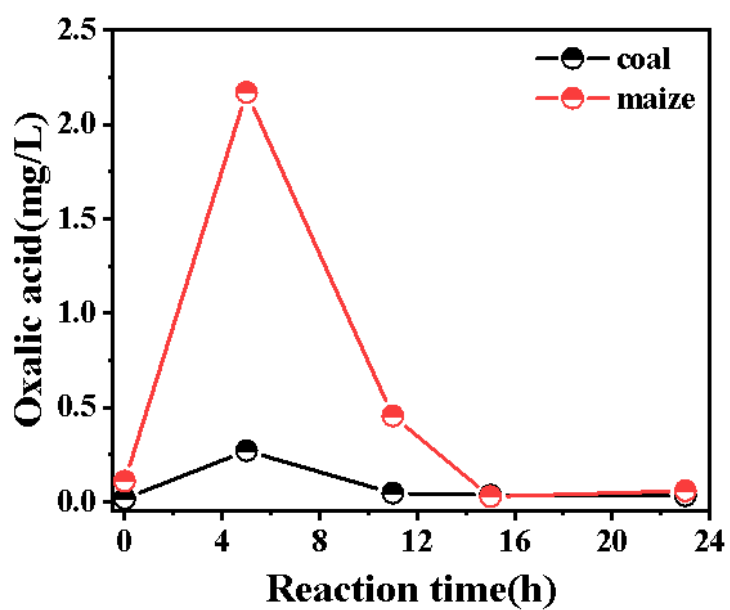

Figure S6 Concentrations of oxalic acids generated under different irradiation time

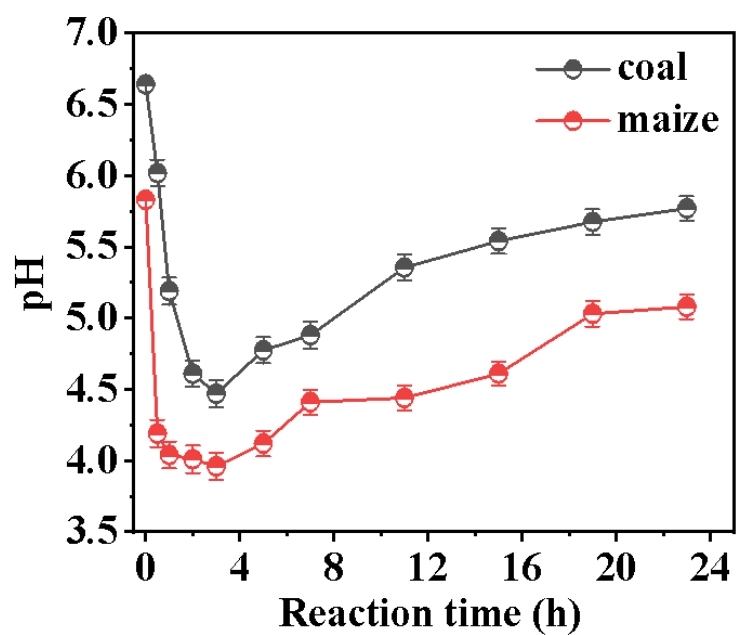

Figure S7 Change of pH value of solution over reaction time

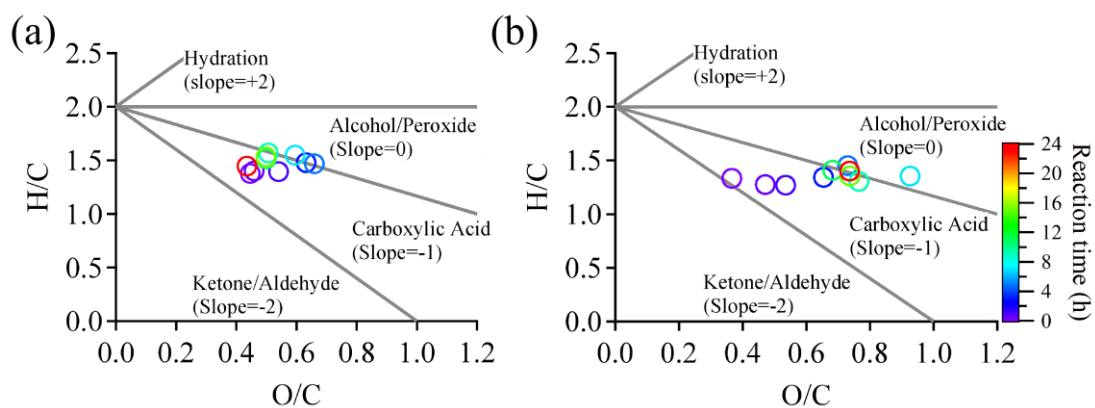

**Figure S8** Van Krevelen diagram of aqSOA products formed after (a) coal and (b) maize smoke WSOM photooxidation

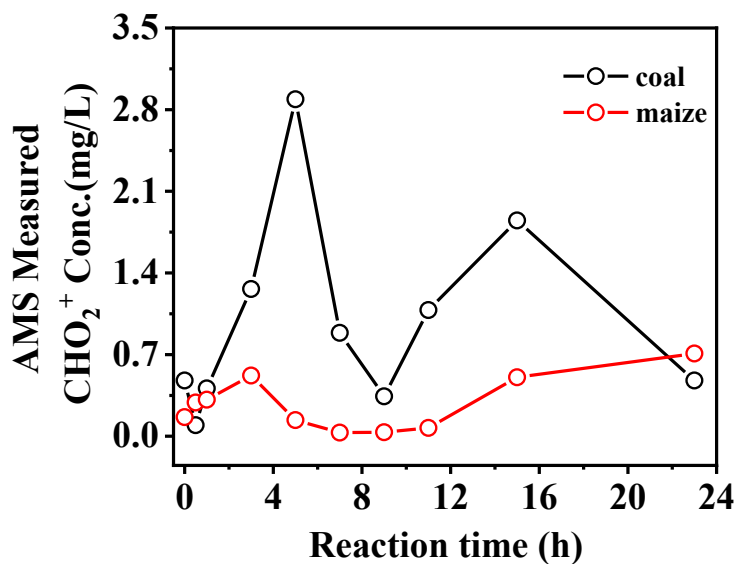

**Figure S9** Organic-equivalent concentrations of  $\text{CHO}_2^+$  (HR-AMS tracer ion for carboxylic acids).

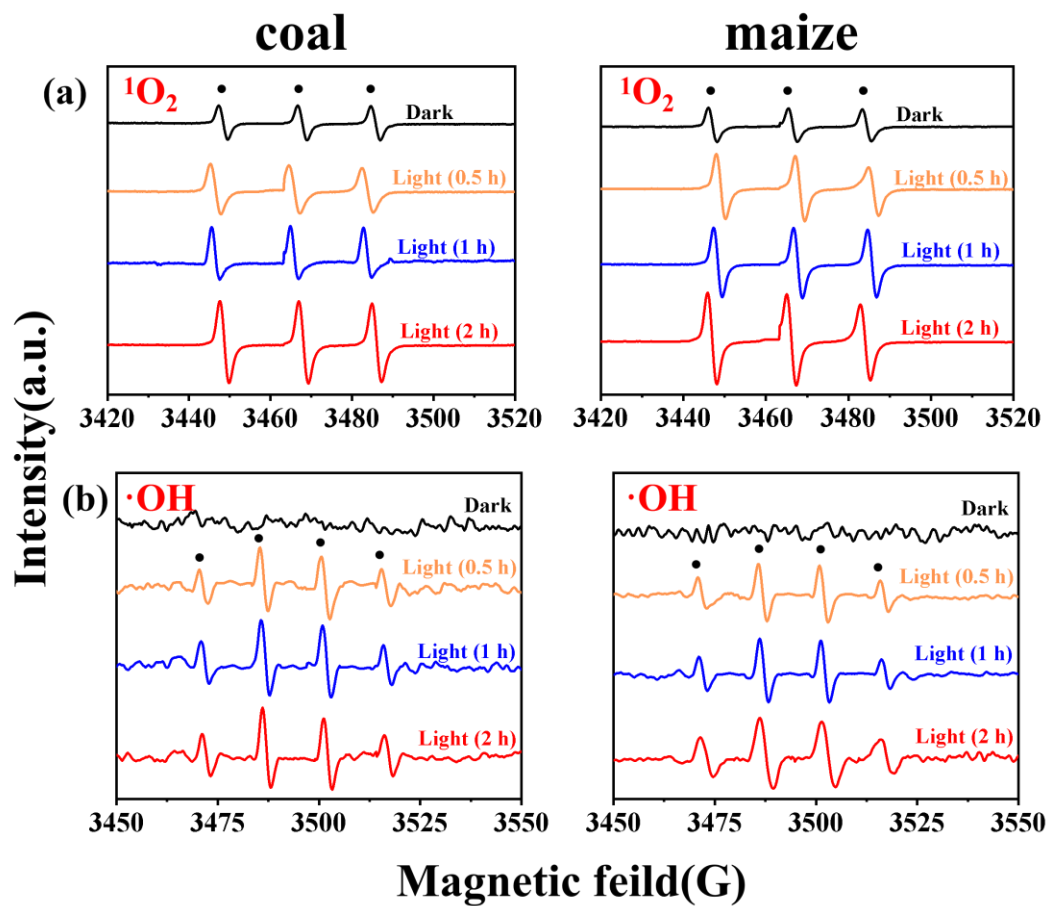

**Figure S10** (a) TEMP spin-trapping ESR spectra of  $^1\text{O}_2$  and (b) DMPO spin-trapping ESR spectra of  $\cdot\text{OH}$  obtained upon 120 min photodegradation for both smoke extracts (15 mgC/L) with adding of 10 mM  $\text{H}_2\text{O}_2$ .

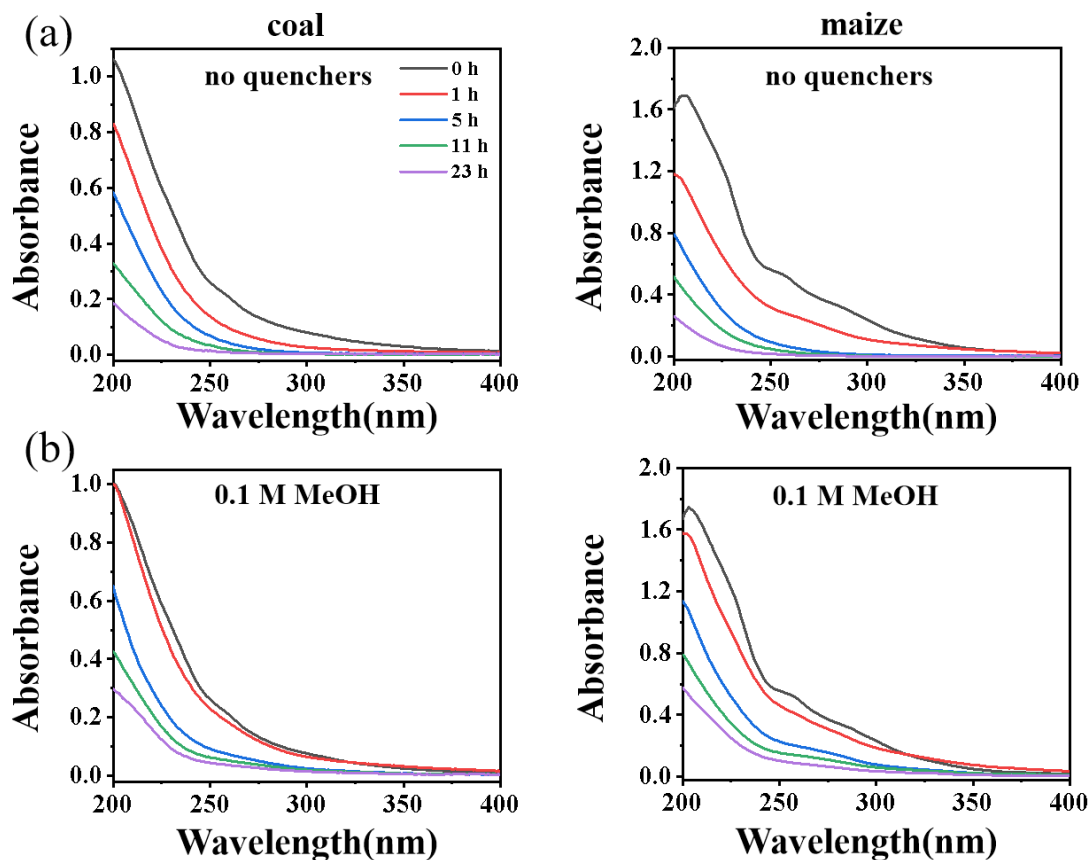

**Figure S11** UV-vis absorption spectra of two smoke extracts upon different irradiation time (a) without methanol as quenchers and (b) with 0.1 M methanol

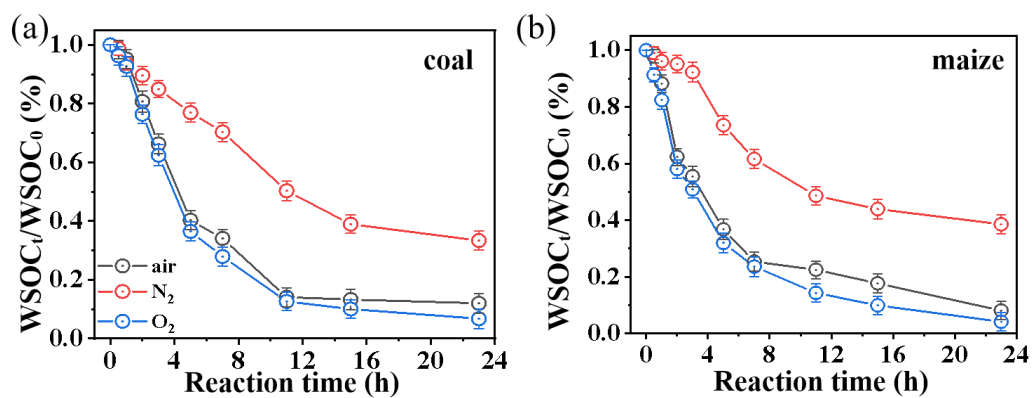

**Figure S12** Comparison in residual WSOC proportion between three saturated gases for (a) coal and (b) maize smoke extracts under OH photooxidation. Adding  $H_2O_2$  of 10 mM.

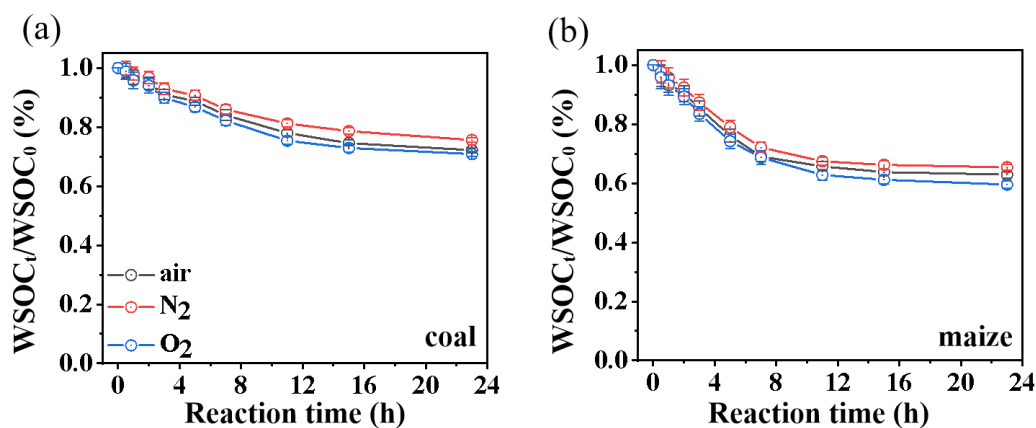

**Figure S13** Comparison in residual WSOC proportion between three saturated gases for (a) coal and (b) maize smoke extracts under photolysis without H<sub>2</sub>O<sub>2</sub>.

### Section S3 Supporting Tables

**Table S1** Variation of inorganic ions concentrations over irradiation time (unit: ppm)

| Samples | Time | Na <sup>+</sup> | NH <sub>4</sub> <sup>+</sup> | K <sup>+</sup> | Mg <sup>2+</sup> | Ca <sup>+</sup> | Cl <sup>-</sup> | NO <sub>3</sub> <sup>-</sup> | SO <sub>4</sub> <sup>2-</sup> |
|---------|------|-----------------|------------------------------|----------------|------------------|-----------------|-----------------|------------------------------|-------------------------------|
| coal    | 0 h  | 0.61            | 0.06                         | 0.42           | 0.02             | 0.27            | 0.80            | 0.10                         | 0.54                          |
|         | 5 h  | 0.58            | 0.16                         | 0.38           | 0.02             | 0.31            | 0.85            | 0.18                         | 0.71                          |
|         | 11 h | 0.52            | 0.17                         | 0.35           | 0.02             | 0.26            | 0.78            | 0.11                         | 0.61                          |
|         | 15 h | 0.54            | 0.22                         | 0.37           | 0.02             | 0.26            | 0.79            | 0.11                         | 0.61                          |
|         | 23 h | 0.63            | 0.31                         | 0.44           | 0.02             | 0.32            | 0.96            | 0.12                         | 0.73                          |
| maize   | 0 h  | 0.38            | 1.88                         | 0.20           | 0.04             | 0.24            | 6.39            | 0.37                         | 0.09                          |
|         | 5 h  | 0.43            | 2.04                         | 0.24           | 0.02             | 0.25            | 6.58            | 0.07                         | 0.25                          |
|         | 11 h | 0.43            | 2.12                         | 0.25           | 0.02             | 0.24            | 6.63            | 0.10                         | 0.22                          |
|         | 15 h | 0.47            | 2.29                         | 0.29           | 0.02             | 0.36            | 5.86            | 0.16                         | 0.18                          |
|         | 23 h | 0.43            | 2.20                         | 0.28           | 0.01             | 0.18            | 6.64            | 0.05                         | 0.19                          |

**Table S2** Percentages of seven categories components before and after aqueous photooxidation

| Samples | Time | Tannin | Lignin | Aromatic | Lipid | Aliphatic | Carboh<br>ydrate | Unsatur<br>ated | Others |
|---------|------|--------|--------|----------|-------|-----------|------------------|-----------------|--------|
| coal    | 0 h  | 1.8    | 58.2   | 3.59     | 15.9  | 17.9      | 1.2              | 0.01            | 1.4    |
|         | 11 h | 11.2   | 31.6   | 1.3      | 22.7  | 21.2      | 4.3              | 0.5             | 7.2    |
|         | 23 h | 1.1    | 16.8   | 1.4      | 35    | 16.2      | 1.5              | 2.6             | 25.4   |
| maize   | 0 h  | 1.3    | 93.1   | 2.8      | 0.7   | 1.7       | 0.3              | 0               | 0.1    |
|         | 11 h | 31.8   | 26.4   | 1.6      | 17.6  | 16.3      | 3.6              | 0.2             | 2.5    |

|      |     |      |     |      |      |     |     |     |
|------|-----|------|-----|------|------|-----|-----|-----|
| 23 h | 2.1 | 16.8 | 1.9 | 54.6 | 15.3 | 1.4 | 0.3 | 7.6 |
|------|-----|------|-----|------|------|-----|-----|-----|

Unstaturated: Unsaturated hydrocarbon

**Table S3** The number and percentage of resistant, degraded and produced molecules for two smoke extracts

| Samples | Time | Molecules                  | Total number | CHO  | CHON | CHOS | CHONS |
|---------|------|----------------------------|--------------|------|------|------|-------|
| coal    | 11 h | Resistant (n)              | 2514         | 1277 | 988  | 187  | 62    |
|         |      | Degraded (n)               | 3082         | 451  | 707  | 515  | 1409  |
|         |      | Produced (n)               | 2643         | 798  | 1041 | 629  | 184   |
|         |      | Percentage of degraded (%) | 55.1         | 8.1  | 12.6 | 9.2  | 25.2  |
|         |      | Percentage of produced (%) | 51.3         | 15.3 | 20.2 | 12.2 | 3.6   |
|         | 23 h | Resistant (n)              | 1847         | 821  | 686  | 186  | 154   |
|         |      | Degraded (n)               | 3749         | 907  | 1009 | 516  | 1317  |
|         |      | Produced (n)               | 3223         | 526  | 1284 | 536  | 877   |
|         |      | Percentage of degraded (%) | 67.0         | 16.2 | 18.0 | 9.2  | 23.5  |
|         |      | Percentage of produced (%) | 63.5         | 10.4 | 25.3 | 10.6 | 17.3  |
| maize   | 11 h | Resistant (n)              | 2146         | 1137 | 995  | 14   | 0     |
|         |      | Degraded (n)               | 2972         | 1016 | 1778 | 93   | 85    |
|         |      | Produced (n)               | 3890         | 1514 | 1960 | 381  | 35    |
|         |      | Percentage of degraded (%) | 58.2         | 19.9 | 34.9 | 1.8  | 1.7   |
|         |      | Percentage of produced (%) | 64.6         | 25.1 | 32.5 | 6.3  | 0.6   |
|         | 23 h | Resistant (n)              | 2248         | 1214 | 1004 | 30   | 0     |
|         |      | Degraded (n)               | 2853         | 924  | 1767 | 77   | 85    |
|         |      | Produced (n)               | 2897         | 1432 | 991  | 369  | 105   |
|         |      | Percentage of degraded (%) | 55.9         | 18.1 | 34.6 | 1.5  | 1.7   |
|         |      | Percentage of produced (%) | 56.3         | 27.8 | 19.3 | 7.7  | 2.0   |

**Note:** n denotes number, percentage of degraded represents its percentage in fresh sample, while percentage of produced represents its percentage in aging sample.

**Table S4** Chemical properties and SOA mass yield for both smoke extracts

| Samples | Time | O/C   | H/C   | O <sub>Sc</sub> | <i>f</i> <sub>43</sub> | <i>f</i> <sub>44</sub> | SOA mass conc. (mg/L) | SOA mass yield (%) |
|---------|------|-------|-------|-----------------|------------------------|------------------------|-----------------------|--------------------|
| coal    | 0    | 0.446 | 1.377 | -0.485          | 0.049                  | 0.148                  | 50.77                 | -                  |
|         | 1    | 0.54  | 1.395 | -0.315          | 0.057                  | 0.167                  | 71.05                 | 148.44             |
|         | 3    | 0.632 | 1.479 | -0.215          | 0.048                  | 0.201                  | 82.48                 | 64.01              |
|         | 5    | 0.659 | 1.468 | -0.15           | 0.058                  | 0.203                  | 102.97                | 20.92              |
|         | 7    | 0.595 | 1.548 | -0.358          | 0.056                  | 0.203                  | 82.10                 | 16.65              |
|         | 9    | 0.506 | 1.569 | -0.557          | 0.067                  | 0.195                  | 91.41                 | 1.87               |
|         | 11   | 0.499 | 1.515 | -0.517          | 0.068                  | 0.182                  | 58.83                 | 24.35              |
|         | 15   | 0.498 | 1.531 | -0.535          | 0.061                  | 0.144                  | 132.51                | 23.04              |
|         | 23   | 0.435 | 1.446 | -0.576          | 0.060                  | 0.141                  | 126.95                | 33.91              |
| maize   | 0    | 0.366 | 1.334 | -0.602          | 0.039                  | 0.072                  | 162.82                | -                  |
|         | 1    | 0.535 | 1.270 | -0.2            | 0.042                  | 0.123                  | 70.11                 | 5.51               |
|         | 3    | 0.654 | 1.343 | -0.035          | 0.040                  | 0.151                  | 61.72                 | 2.46               |
|         | 5    | 0.73  | 1.451 | 0.009           | 0.052                  | 0.199                  | 71.63                 | 3.89               |
|         | 7    | 0.926 | 1.354 | 0.498           | 0.054                  | 0.202                  | 72.69                 | 6.36               |
|         | 9    | 0.765 | 1.305 | 0.225           | 0.024                  | 0.101                  | 75.71                 | 2.72               |
|         | 11   | 0.683 | 1.358 | -0.042          | 0.053                  | 0.198                  | 84.44                 | 4.24               |
|         | 15   | 0.737 | 1.355 | 0.119           | 0.056                  | 0.255                  | 76.90                 | 2.68               |
|         | 23   | 0.736 | 1.401 | 0.071           | 0.051                  | 0.250                  | 81.66                 | 2.86               |

**Table S5** Concentration and contribution to WSOM photodegradation of each ROS under different H<sub>2</sub>O<sub>2</sub> concentration

| Samples | [H <sub>2</sub> O <sub>2</sub> ] (mM) | [ROS] (M)                                 |                                                                     |                                                        | Contribution ratio (%) |                             |                 |
|---------|---------------------------------------|-------------------------------------------|---------------------------------------------------------------------|--------------------------------------------------------|------------------------|-----------------------------|-----------------|
|         |                                       | [•OH] <sub>ss</sub> (×10 <sup>-14</sup> ) | [ <sup>1</sup> O <sub>2</sub> ] <sub>ss</sub> (×10 <sup>-13</sup> ) | [ <sup>3</sup> C*] <sub>ss</sub> (×10 <sup>-13</sup> ) | •OH                    | <sup>1</sup> O <sub>2</sub> | <sup>3</sup> C* |
| coal    | 0.5                                   | 0.7                                       | 4.0                                                                 | 1.0                                                    | 25.8                   | 0.5                         | 73.7            |
|         | 1                                     | 1.6                                       | 3.4                                                                 | 1.0                                                    | 46.6                   | 0.3                         | 53.1            |

|       |     |     |     |     |      |     |      |
|-------|-----|-----|-----|-----|------|-----|------|
|       | 3   | 5.7 | 3.5 | 2.1 | 58.8 | 0.1 | 41.1 |
|       | 5   | 8.7 | 4.1 | 2.6 | 63.5 | 0.1 | 36.4 |
|       | 10  | 9.1 | 3.5 | 9.0 | 86.4 | 0.8 | 12.8 |
|       | 0.5 | 1.3 | 9.4 | 1.2 | 37.2 | 0.8 | 62.0 |
|       | 1   | 2.2 | 8.7 | 1.8 | 39.3 | 0.5 | 60.2 |
| maize | 3   | 3.8 | 2.5 | 1.3 | 60.9 | 0.1 | 39.0 |
|       | 5   | 7.3 | 7.2 | 2.3 | 62.2 | 0.2 | 37.6 |
|       | 10  | 8.6 | 0.2 | 7.1 | 80.9 | 3.1 | 16.0 |

**Table S6** The top 10 most abundant compounds identified in coal smoke WSOM by FT-ICR MS

| Samples | DBE | Formula                                          | Percentage (%) | Functional groups          | FTIRC-MS category |
|---------|-----|--------------------------------------------------|----------------|----------------------------|-------------------|
|         | 0.5 | C <sub>12</sub> H <sub>26</sub> O <sub>4</sub> S | 3.44           | organosulfate              | lipid -like       |
|         | 4.5 | C <sub>17</sub> H <sub>28</sub> O <sub>3</sub> S | 2.97           | organosulfate              | lipid-like        |
|         | 7.5 | C <sub>12</sub> H <sub>12</sub> O <sub>5</sub>   | 1.94           | aromatic compound          | lignin-like       |
|         | 4.5 | C <sub>18</sub> H <sub>30</sub> O <sub>3</sub> S | 1.82           | organosulfate              | lipid -like       |
| coal    | 4.5 | C <sub>16</sub> H <sub>26</sub> O <sub>3</sub> S | 1.32           | organosulfate              | lipid -like       |
| 0 h     | 1.5 | C <sub>16</sub> H <sub>32</sub> O <sub>2</sub>   | 1.20           | fatty acid                 | lipid -like       |
|         | 0.5 | C <sub>14</sub> H <sub>30</sub> O <sub>5</sub> S | 1.03           | hydroxy-organosulfate      | lipid -like       |
|         | 1.5 | C <sub>18</sub> H <sub>36</sub> O <sub>3</sub>   | 0.99           | hydroxy fatty acid         | lipid-like        |
|         | 7.5 | C <sub>13</sub> H <sub>14</sub> O <sub>5</sub>   | 0.85           | trimethoxybenzoic acid     | lignin-like       |
|         | 9.5 | C <sub>14</sub> H <sub>12</sub> O <sub>6</sub>   | 0.84           | lignin-like dimer          | lignin-like       |
|         | 1.5 | C <sub>16</sub> H <sub>32</sub> O <sub>2</sub>   | 4.21           | palmitic acid              | lipid-like        |
|         | 0.5 | C <sub>18</sub> H <sub>39</sub> NO <sub>5</sub>  | 2.09           | hydroxy fatty acid amide   | lipid-like        |
|         | 1.5 | C <sub>18</sub> H <sub>36</sub> O <sub>2</sub>   | 1.91           | octadecanoic acid          | lipid-like        |
|         | 4.5 | C <sub>18</sub> H <sub>30</sub> O <sub>3</sub> S | 1.33           | unsaturated organosulfate  | lipid-like        |
| coal    | 0.5 | C <sub>19</sub> H <sub>40</sub> O <sub>6</sub>   | 1.13           | polyhydroxy nonadecane     | lipid-like        |
| 11 h    | 3.5 | C <sub>12</sub> H <sub>20</sub> O <sub>3</sub>   | 1.02           | dodecadienoic acid         | lipid-like        |
|         | 4.5 | C <sub>17</sub> H <sub>28</sub> O <sub>3</sub> S | 0.96           | unsaturated organosulfate  | lipid-like        |
|         | 2.5 | C <sub>18</sub> H <sub>34</sub> O <sub>3</sub>   | 0.96           | unsaturated fatty acid     | lipid-like        |
|         | 4.5 | C <sub>19</sub> H <sub>32</sub> O <sub>3</sub> S | 0.85           | unsaturated organosulfate  | lipid-like        |
|         | 1.5 | C <sub>18</sub> H <sub>36</sub> O <sub>3</sub>   | 0.81           | hydroxyl octadecanoic acid | lipid-like        |
|         | 0.5 | C <sub>16</sub> H <sub>35</sub> NO <sub>2</sub>  | 6.21           | fatty amide                | lipid-like        |
|         | 4.5 | C <sub>14</sub> H <sub>22</sub> O                | 5.80           | alkyl acetophenone         | lipid -like       |
|         | 1.5 | C <sub>16</sub> H <sub>32</sub> O <sub>2</sub>   | 3.41           | hexadecanoic acid          | lipid -like       |
| coal    | 0.5 | C <sub>18</sub> H <sub>39</sub> NO <sub>3</sub>  | 3.24           | hydroxy fatty acid amide   | lipid -like       |
| 23 h    | 1.5 | C <sub>12</sub> H <sub>24</sub> O <sub>2</sub>   | 2.86           | saturated fatty acid       | lipid -like       |
|         | 0.5 | C <sub>18</sub> H <sub>39</sub> NO <sub>4</sub>  | 2.73           | organic nitrate            | lipid -like       |
|         | 0.5 | C <sub>12</sub> H <sub>26</sub> O <sub>4</sub> S | 2.52           | organosulfate              | lipid -like       |
|         | 0.5 | C <sub>20</sub> H <sub>43</sub> NO <sub>5</sub>  | 1.99           | hydroxy organic nitrate    | lipid-like        |
|         | 5.5 | C <sub>17</sub> H <sub>26</sub> O <sub>4</sub>   | 1.91           | dicarboxylic acids         | lipid-like        |

1.5 C<sub>18</sub>H<sub>36</sub>O<sub>2</sub> 1.74 octadecanoic acid lipid-like

**Table S7** The top 10 most abundant compounds identified in maize smoke WSOM by FT-ICR MS

| Samples       | DBE                                            | Formula                                          | Percentage (%)                      | Functional groups              | FTIRC-MS category  |
|---------------|------------------------------------------------|--------------------------------------------------|-------------------------------------|--------------------------------|--------------------|
| maize<br>0 h  | 5.5                                            | C <sub>9</sub> H <sub>10</sub> O <sub>4</sub>    | 9.56                                | vanillic acid                  | lignin-like        |
|               | 6.5                                            | C <sub>8</sub> H <sub>6</sub> O <sub>4</sub>     | 4.63                                | Phthalic acid                  | lignin-like        |
|               | 5.5                                            | C <sub>10</sub> H <sub>12</sub> O <sub>4</sub>   | 1.62                                | veratric acid                  | lignin-like        |
|               | 5.5                                            | C <sub>7</sub> H <sub>7</sub> NO <sub>4</sub>    | 1.36                                | nitrobenzoic acid              | lignin-like        |
|               | 6.5                                            | C <sub>9</sub> H <sub>8</sub> O <sub>3</sub>     | 1.18                                | hydroxycinnamic acid           | lignin-like        |
|               | 5.5                                            | C <sub>9</sub> H <sub>10</sub> O <sub>3</sub>    | 1.16                                | vanillin                       | lignin-like        |
|               | 10.5                                           | C <sub>18</sub> H <sub>18</sub> O <sub>7</sub>   | 0.81                                | guaiacyl dimer                 | lignin-like        |
|               | 8.5                                            | C <sub>11</sub> H <sub>8</sub> O <sub>3</sub>    | 0.74                                | hydroxyanthraquinone           | condensed aromatic |
|               | 6.5                                            | C <sub>10</sub> H <sub>10</sub> O <sub>4</sub>   | 0.71                                | ferulic acid                   | lignin-like        |
|               | 6.5                                            | C <sub>9</sub> H <sub>8</sub> O <sub>4</sub>     | 0.66                                | polyphenols                    | lignin-like        |
| maize<br>11 h | 4.5                                            | C <sub>14</sub> H <sub>22</sub> O                | 2.63                                | aromatic ketone                | aromatic           |
|               | 1.5                                            | C <sub>16</sub> H <sub>32</sub> O <sub>2</sub>   | 2.58                                | saturated fatty acids          | lipid-like         |
|               | 1.5                                            | C <sub>18</sub> H <sub>36</sub> O <sub>2</sub>   | 2.15                                | saturated fatty acids          | lipid-like         |
|               | 2.5                                            | C <sub>13</sub> H <sub>25</sub> NO <sub>3</sub>  | 2.04                                | n-hydroxytridecanamide         | lipid-like         |
|               | 0.5                                            | C <sub>12</sub> H <sub>26</sub> O <sub>4</sub> S | 1.67                                | alkyl organosulfate            | aliphatic          |
|               | 1.5                                            | C <sub>12</sub> H <sub>24</sub> O <sub>2</sub>   | 1.50                                | lauric acid                    | aliphatic          |
|               | 1.5                                            | C <sub>9</sub> H <sub>18</sub> O <sub>6</sub>    | 1.18                                | polyhydroxy nonanoic acid      | carbohydrate       |
|               | 5.5                                            | C <sub>9</sub> H <sub>10</sub> O <sub>7</sub>    | 0.96                                | hydroxyphthalic acid           | tannin-like        |
|               | 2.5                                            | C <sub>18</sub> H <sub>34</sub> O <sub>3</sub>   | 0.75                                | hydroxy unsaturated fatty acid | lipid-like         |
| 3.5           | C <sub>17</sub> H <sub>30</sub> O <sub>5</sub> | 0.74                                             | polyhydroxy unsaturated fatty acids | lipid-like                     |                    |
| maize<br>23 h | 4.5                                            | C <sub>14</sub> H <sub>22</sub> O                | 13.18                               | aromatic ketone                | aromatic           |
|               | 1.5                                            | C <sub>16</sub> H <sub>32</sub> O <sub>2</sub>   | 7.03                                | saturated fatty acids          | lipid-like         |
|               | 1.5                                            | C <sub>12</sub> H <sub>24</sub> O <sub>2</sub>   | 5.83                                | lauric acid                    | aliphatic          |
|               | 1.5                                            | C <sub>18</sub> H <sub>36</sub> O <sub>2</sub>   | 5.26                                | saturated fatty acids          | lipid-like         |
|               | 0.5                                            | C <sub>12</sub> H <sub>26</sub> O <sub>4</sub> S | 3.37                                | alkyl organosulfate            | aliphatic          |
|               | 2.5                                            | C <sub>18</sub> H <sub>34</sub> O <sub>3</sub>   | 2.99                                | unsaturated fatty acid         | lipid-like         |
|               | 0.5                                            | C <sub>16</sub> H <sub>35</sub> NO <sub>2</sub>  | 2.15                                | fatty acid amide               | lipid-like         |
|               | 7.5                                            | C <sub>28</sub> H <sub>44</sub> O <sub>2</sub>   | 1.81                                | ergosterol peroxide            | lipid-like         |
|               | 4.5                                            | C <sub>15</sub> H <sub>24</sub> O <sub>3</sub>   | 1.48                                | sesquiterpenic acid            | lipid-like         |
|               | 0.5                                            | C <sub>14</sub> H <sub>30</sub> O <sub>5</sub> S | 1.32                                | hydroxyl organosulfate         | lipid-like         |
